# Supplementary material for: 3’UTR RNA editing driven by ADAR1 modulates MDM2 expression in breast cancer cells
Source: Springer Nature journal article supplement (doi:10.1007/s10142-025-01611-3), 2025-05-16

a

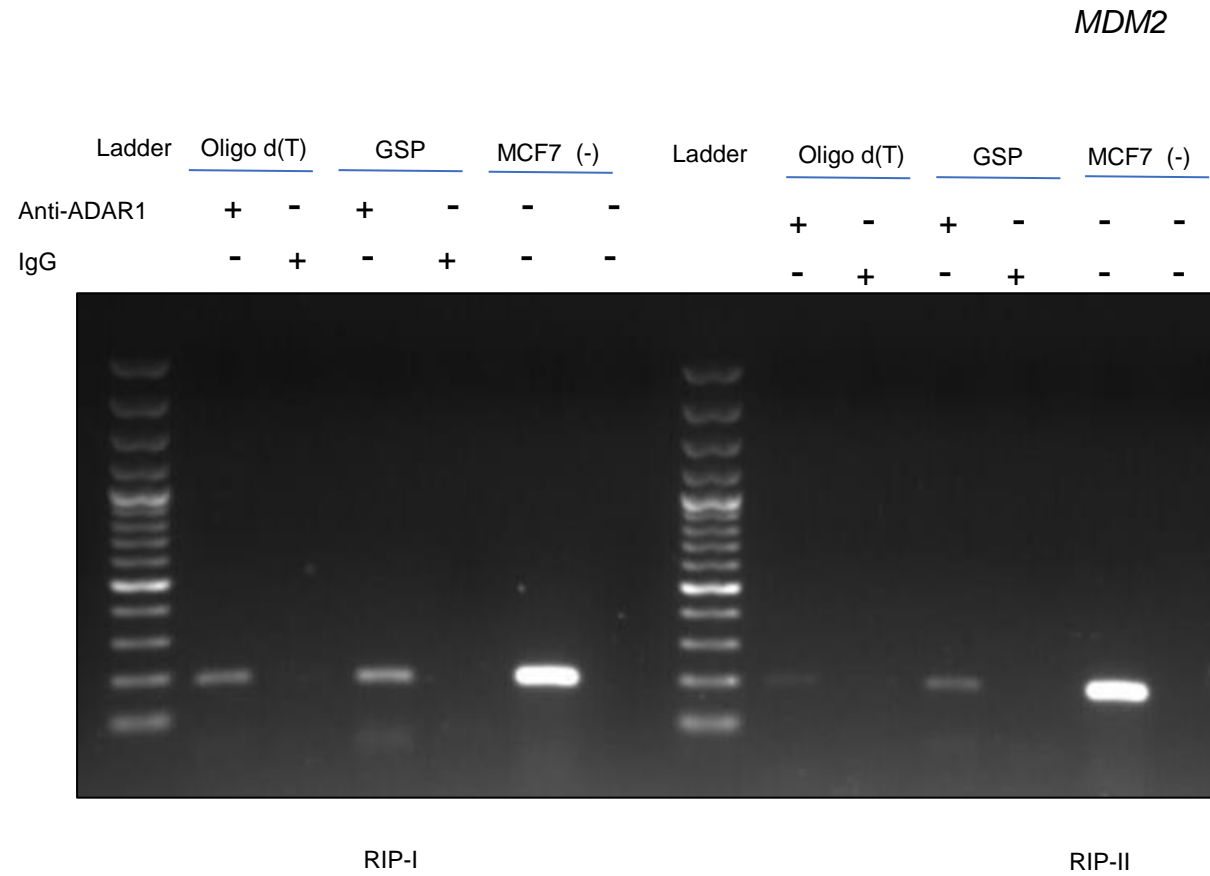

Ladder : GeneRuler 100 bp Plus DNA Ladder

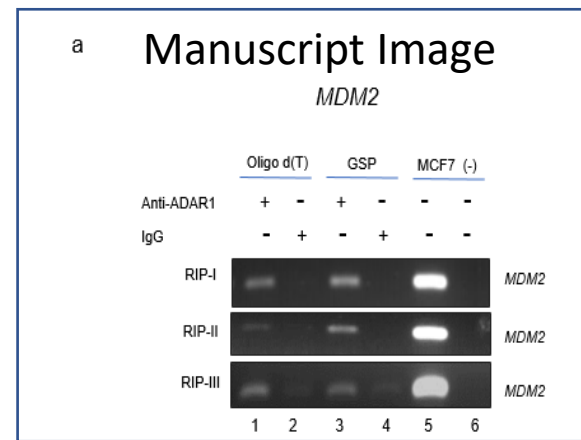

Figure 3

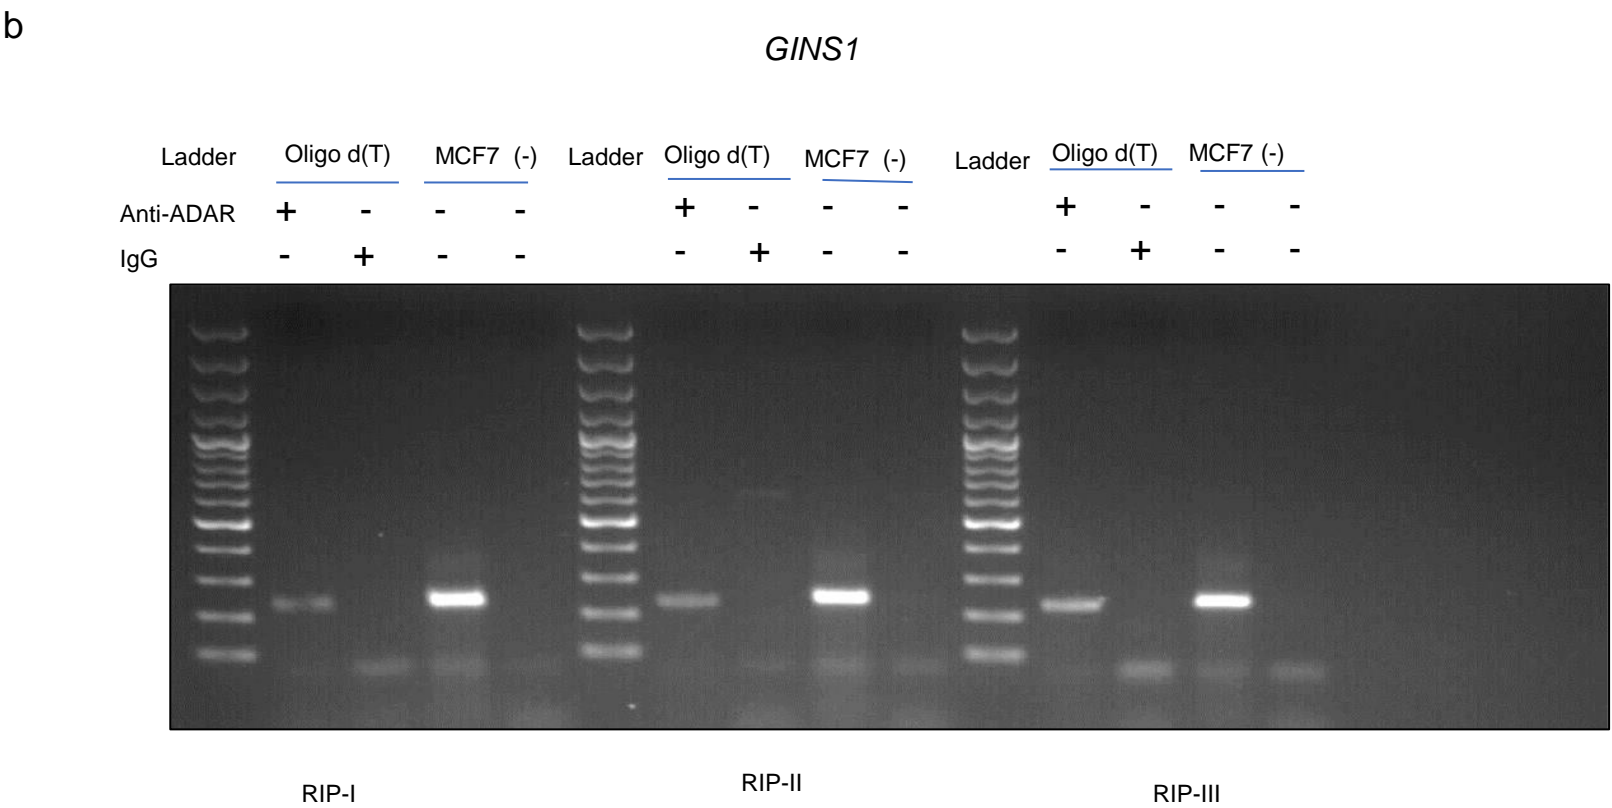

Ladder: GeneRuler 100 bp Plus DNA Ladder

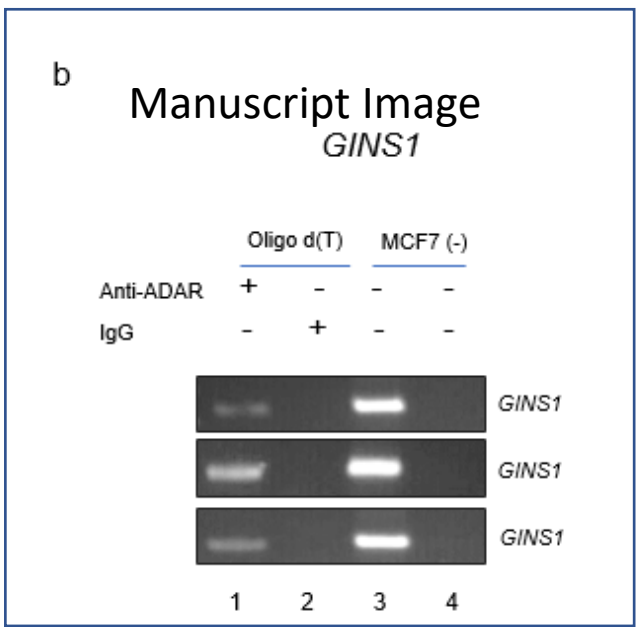

Figure 3

C

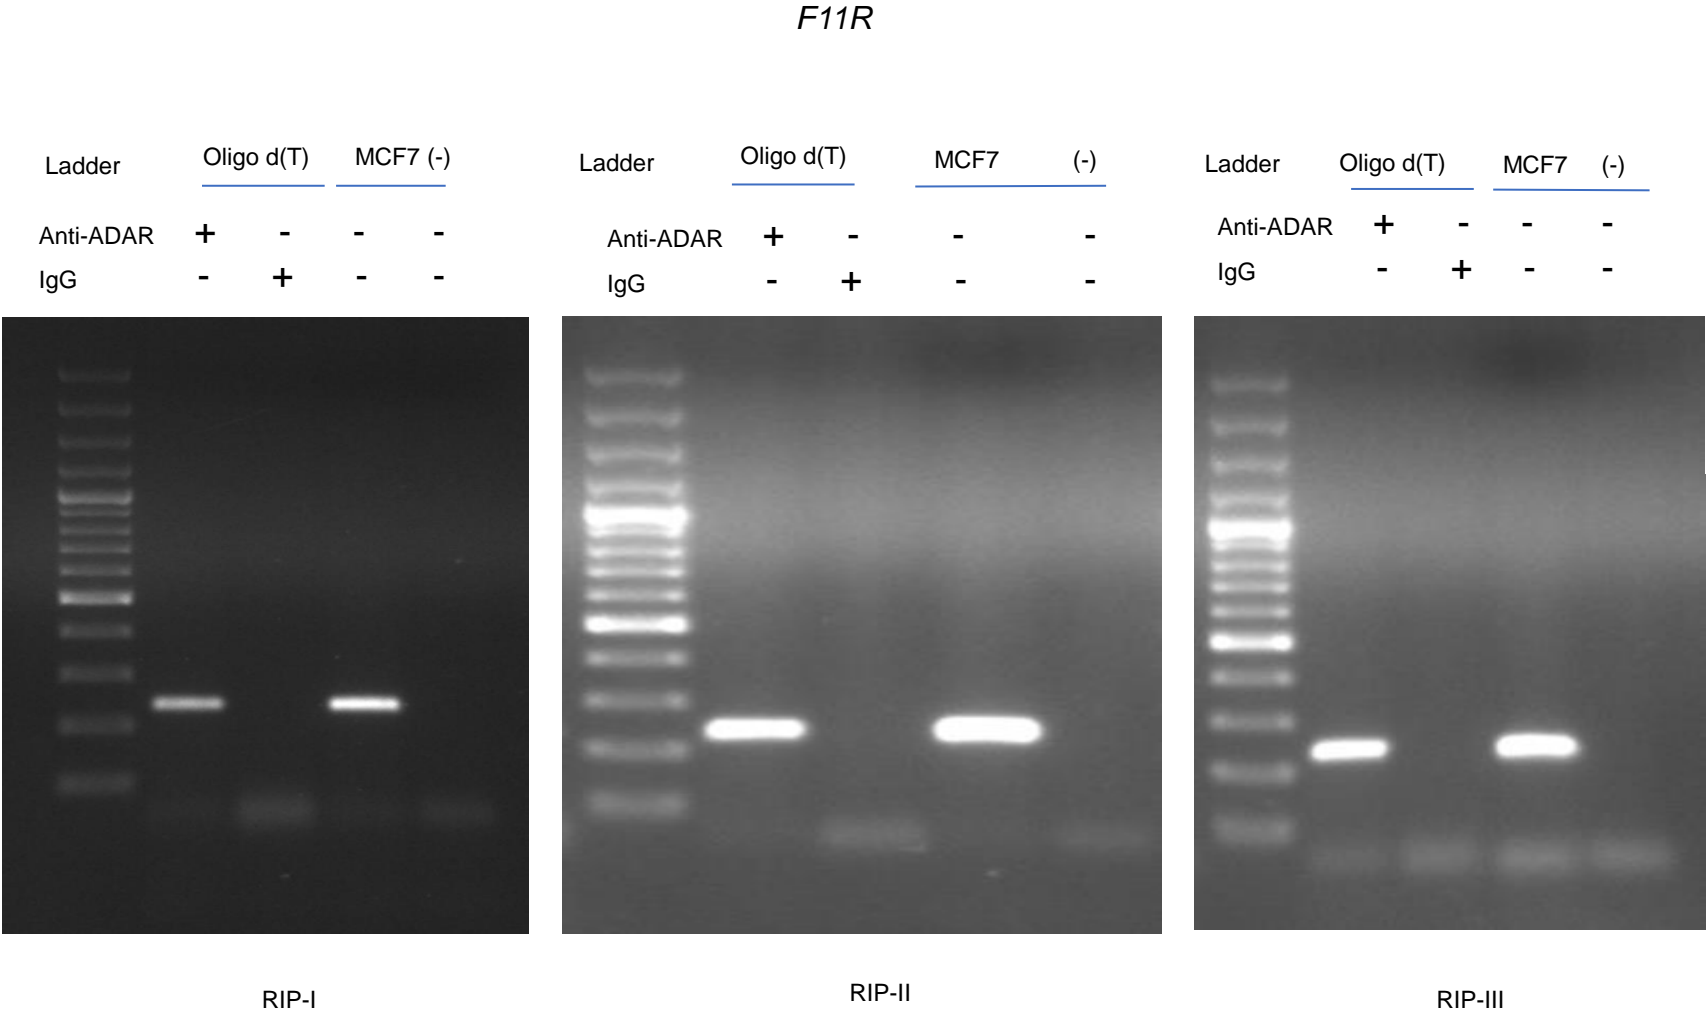

Manuscript Image

C

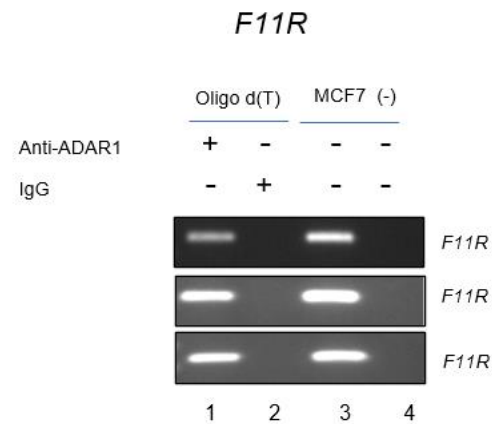

Figure 4

b

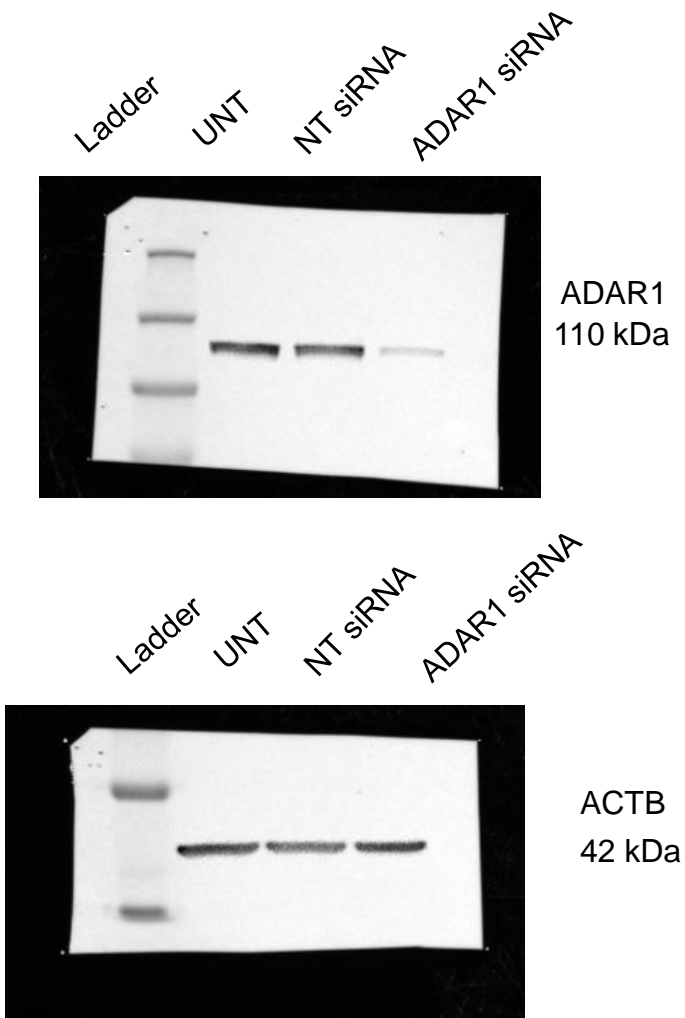

Ladder: Thermo Scientific™ PageRuler™ Plus Prestained Protein Ladder, 10 to 250 kDa

a

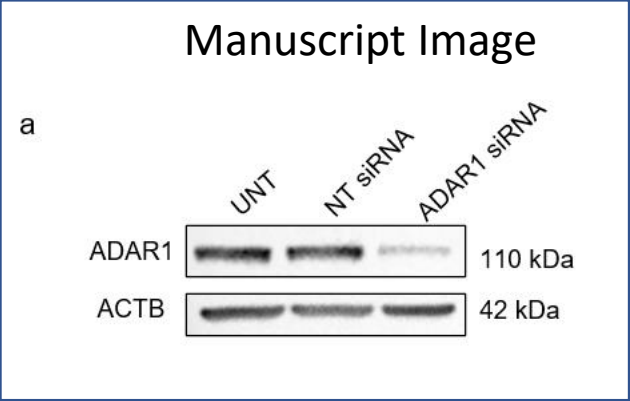

Figure 6

b

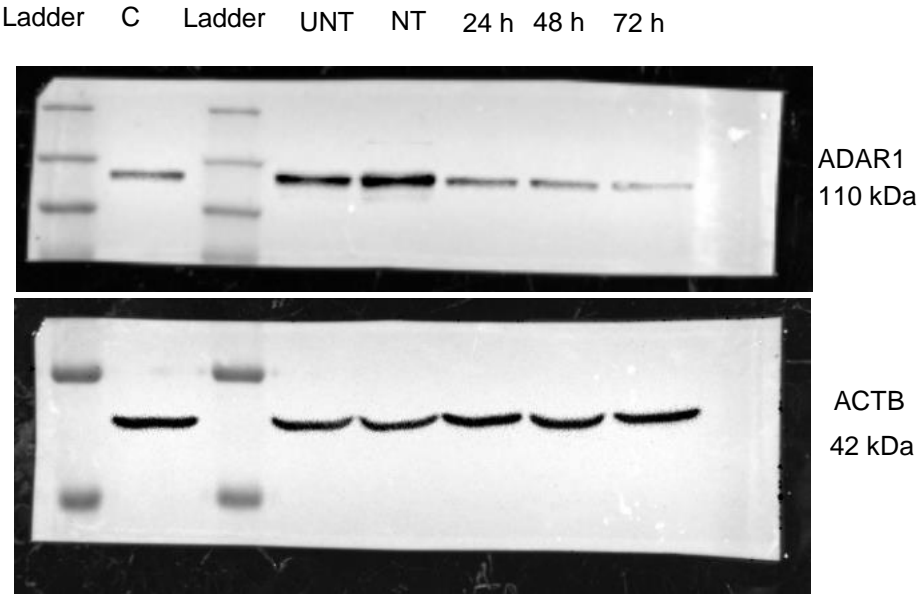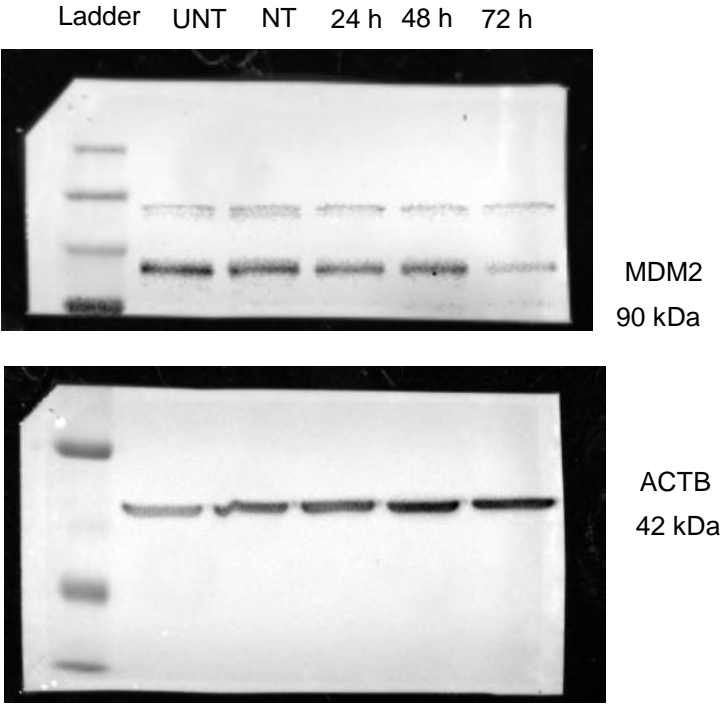

Ladder and wb control lysate lanes were cropped in the manuscript image

Ladder: Thermo Scientific™ PageRuler™ Plus Prestained Protein Ladder, 10 to 250 kDa

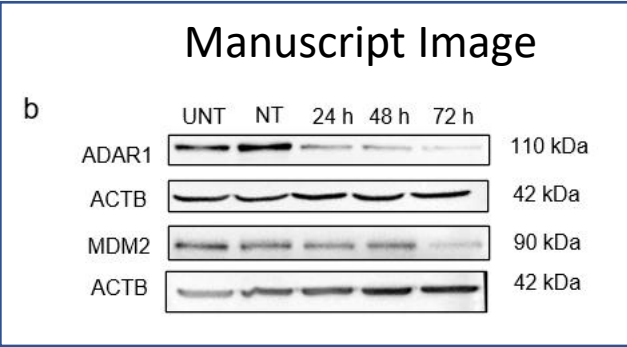

Figure 7  
a

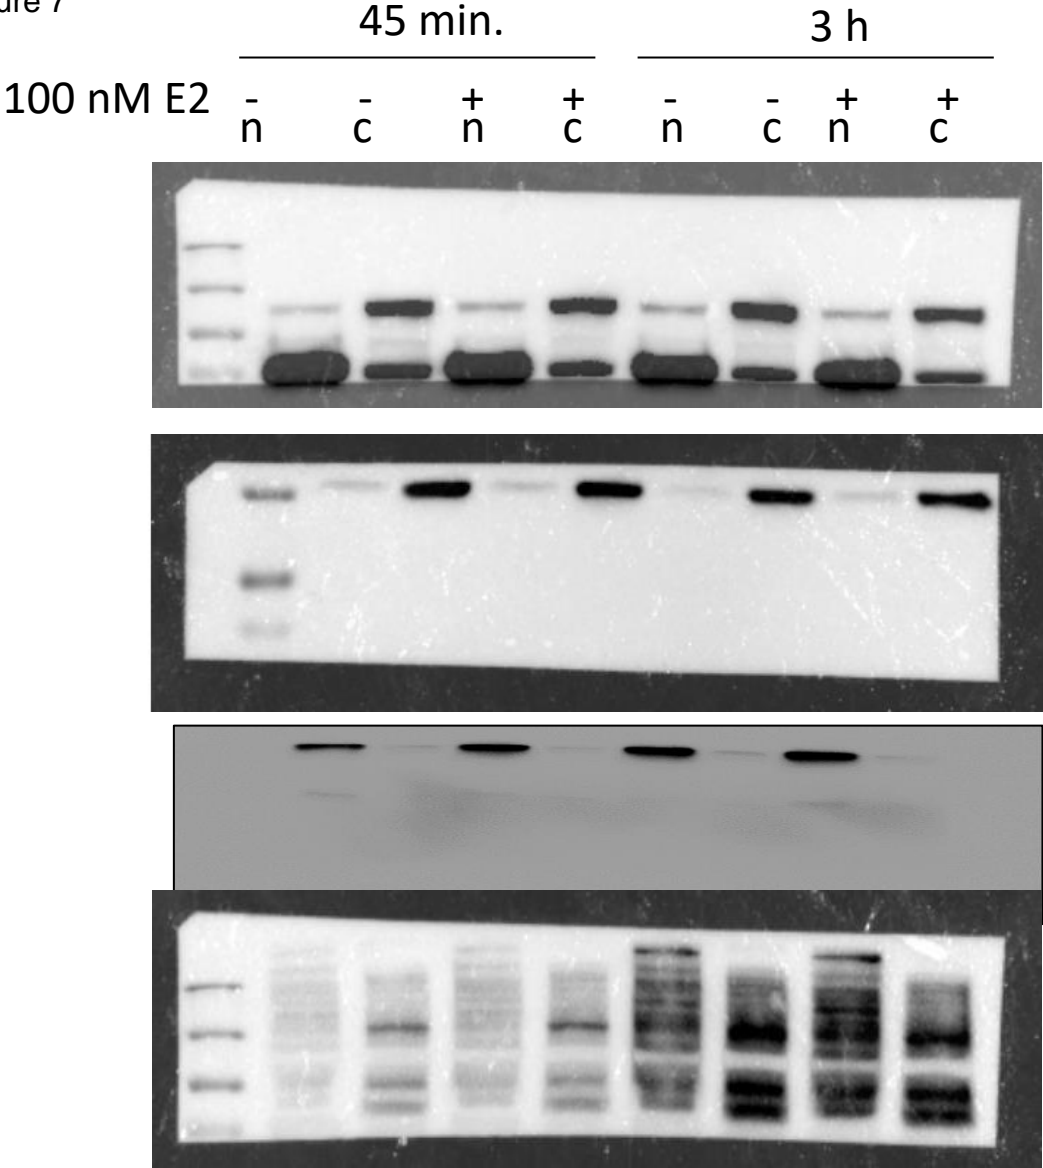

CSTF2-fusion  
CSTF2

TUBA1A

HDAC

Biotin

Western Blot image (due to limited biotin pull down lysate concentration, same membrane was cut and probed/reprobed with CSTF2, TUBA1A, HDAC and Biotin antibodies)

Manuscript Image

Figure 7

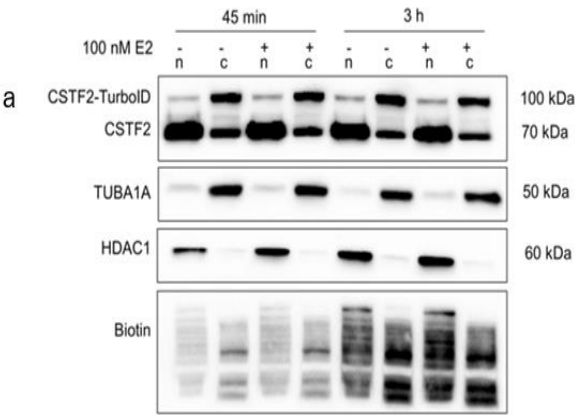

Figure 7  
d

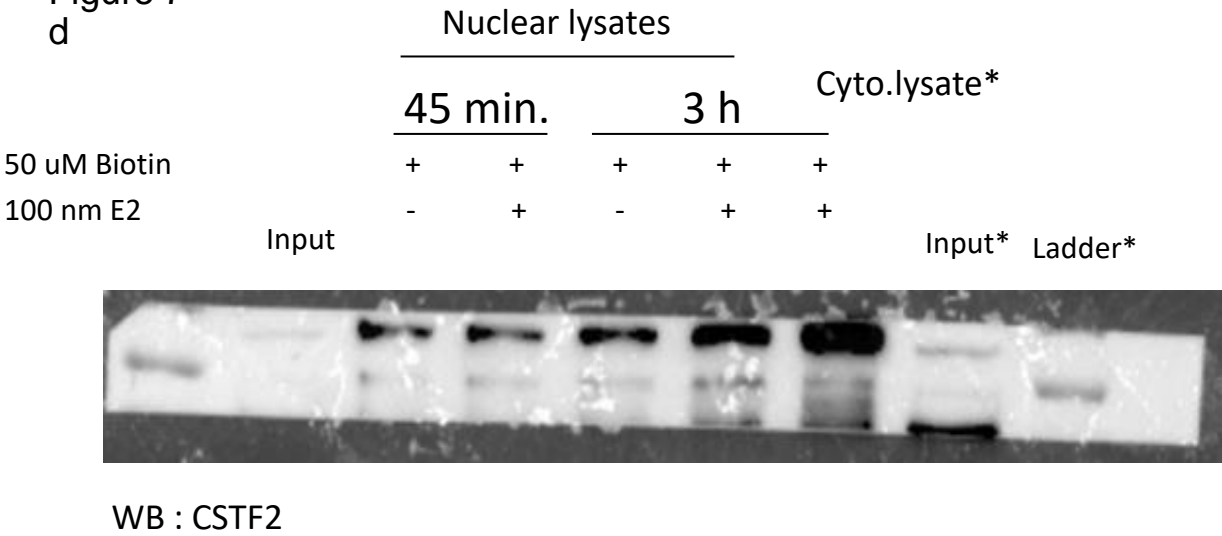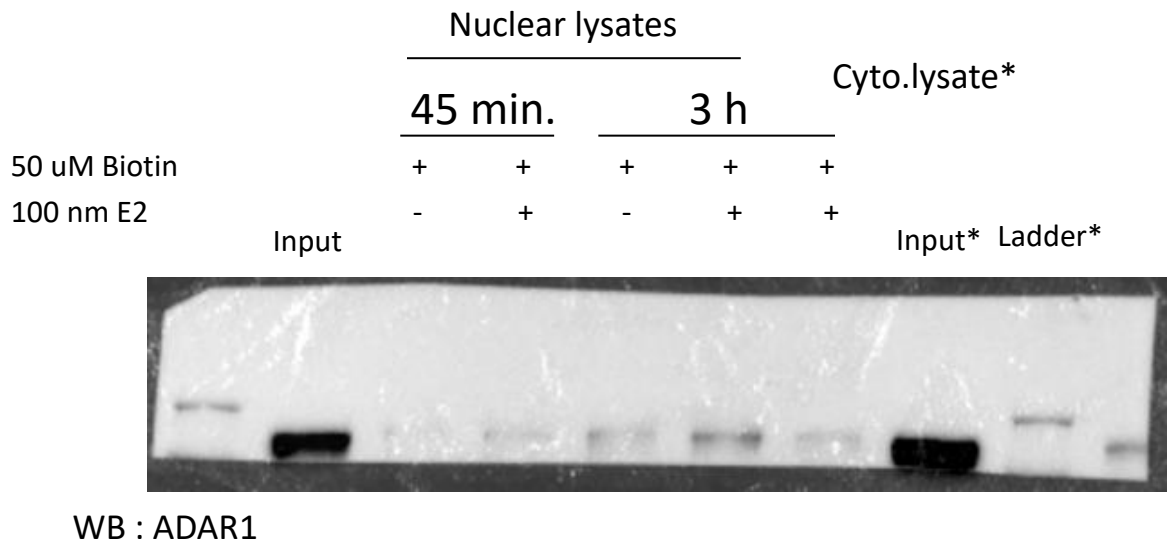

same membrane was cut and probed with CSTF2, ADAR1 and Biotin antibodies

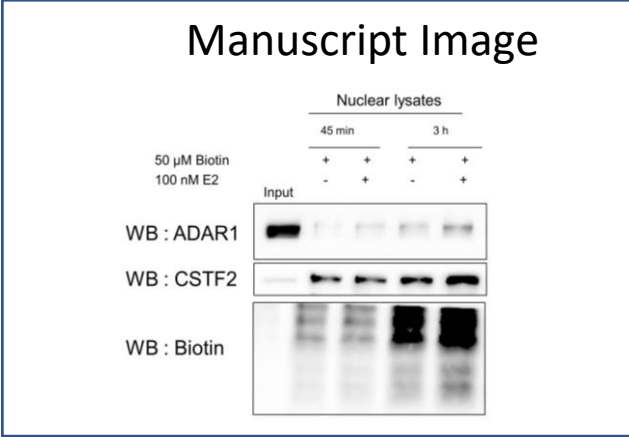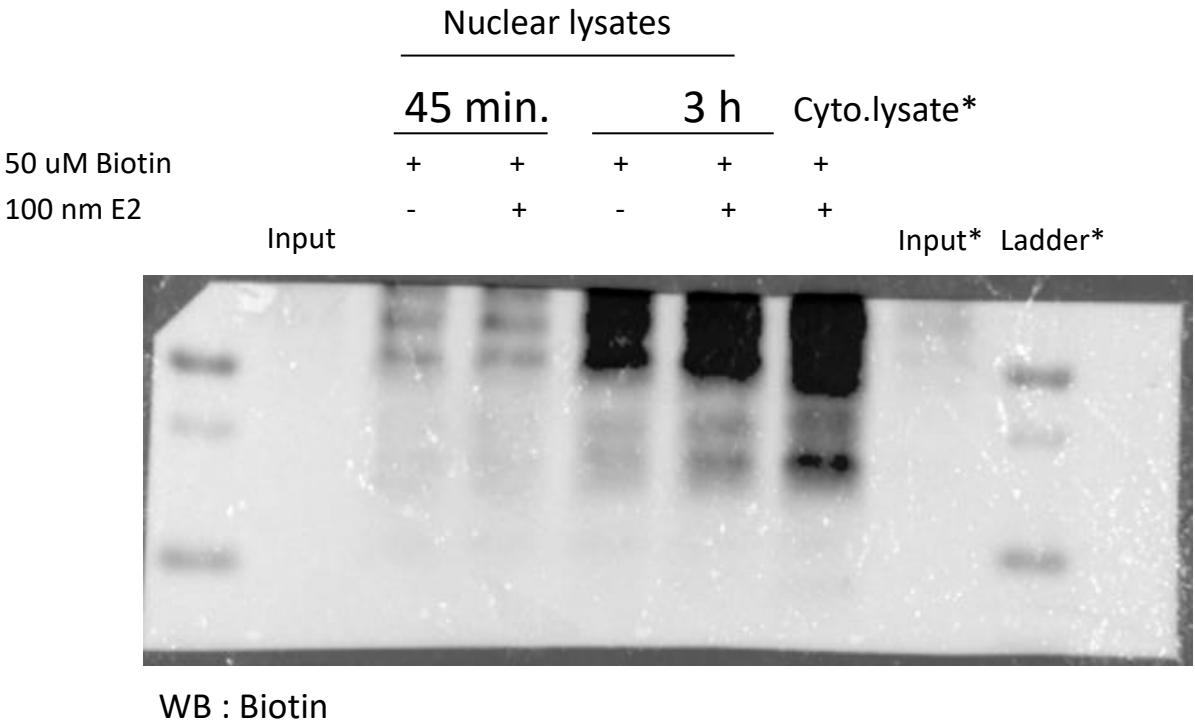

\*Cytoplasmic lysate, input and ladder lanes were cropped in the manuscript figure for clarity. Removed input and ladder (last two lanes) are already present in lanes 1-2

Figure 7

e

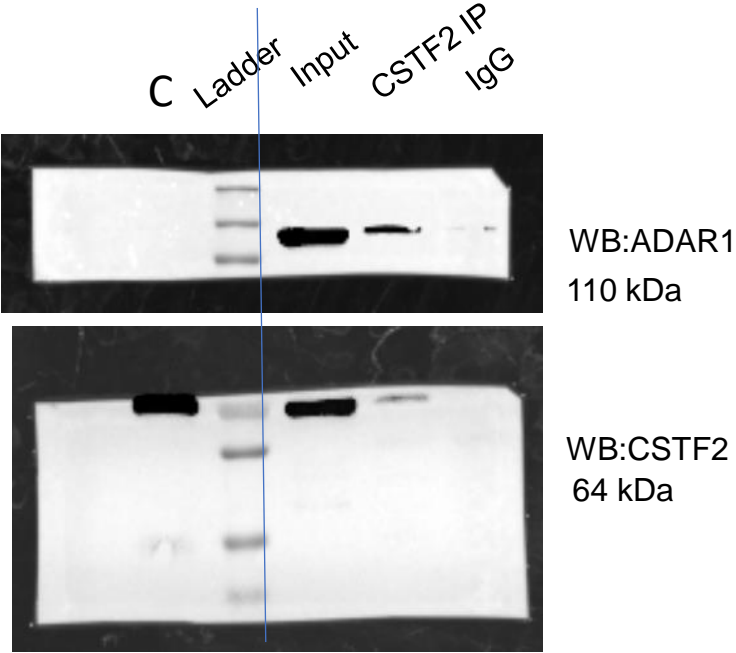

same membrane was cut and probed with CSTF2 and ADAR1 antibodies  
Lane 1 was cytoplasmic lysate (c) for wb control (cropped in manuscript image)

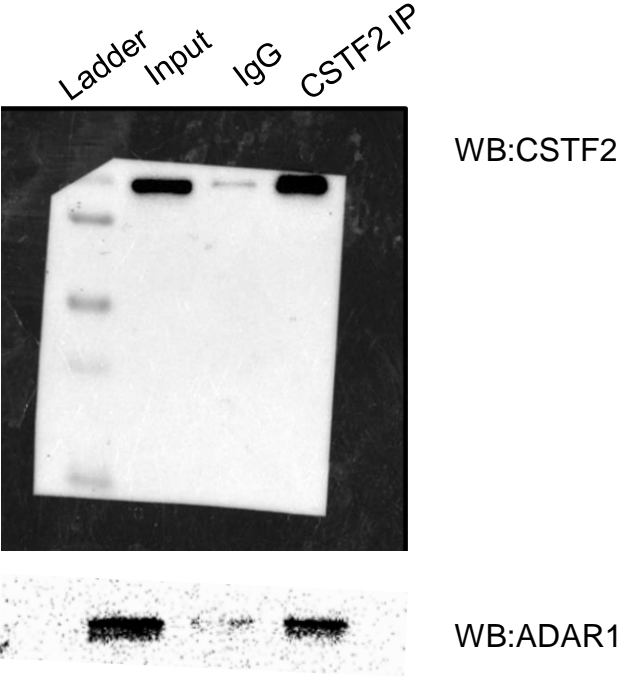

same membrane was cut and probed with CSTF2 and ADAR1 antibodies

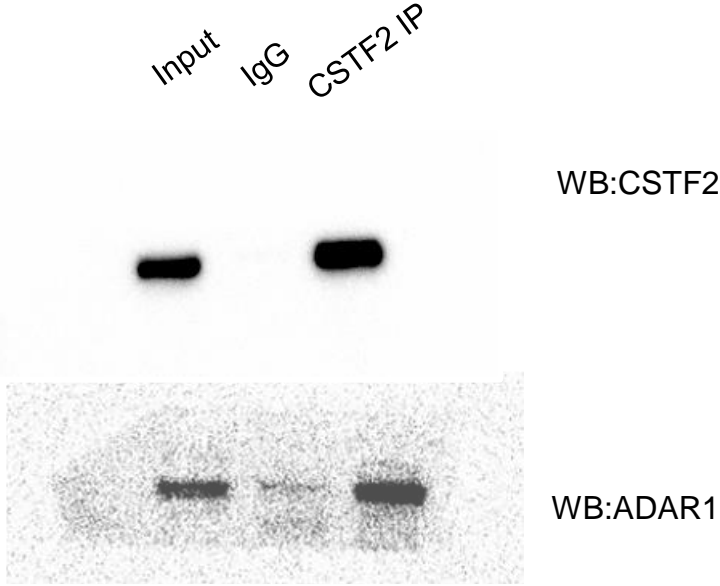

same membrane was cut and probed with CSTF2 and ADAR1 antibodies

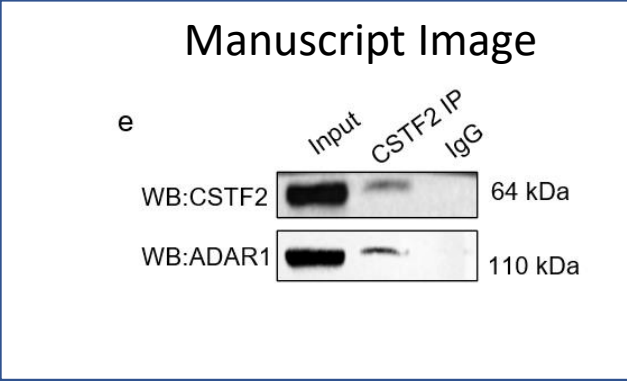

Ladder: Thermo Scientific™ PageRuler™ Plus Prestained Protein Ladder, 10 to 250 kDa

(In supp. Figures)



Figure 8

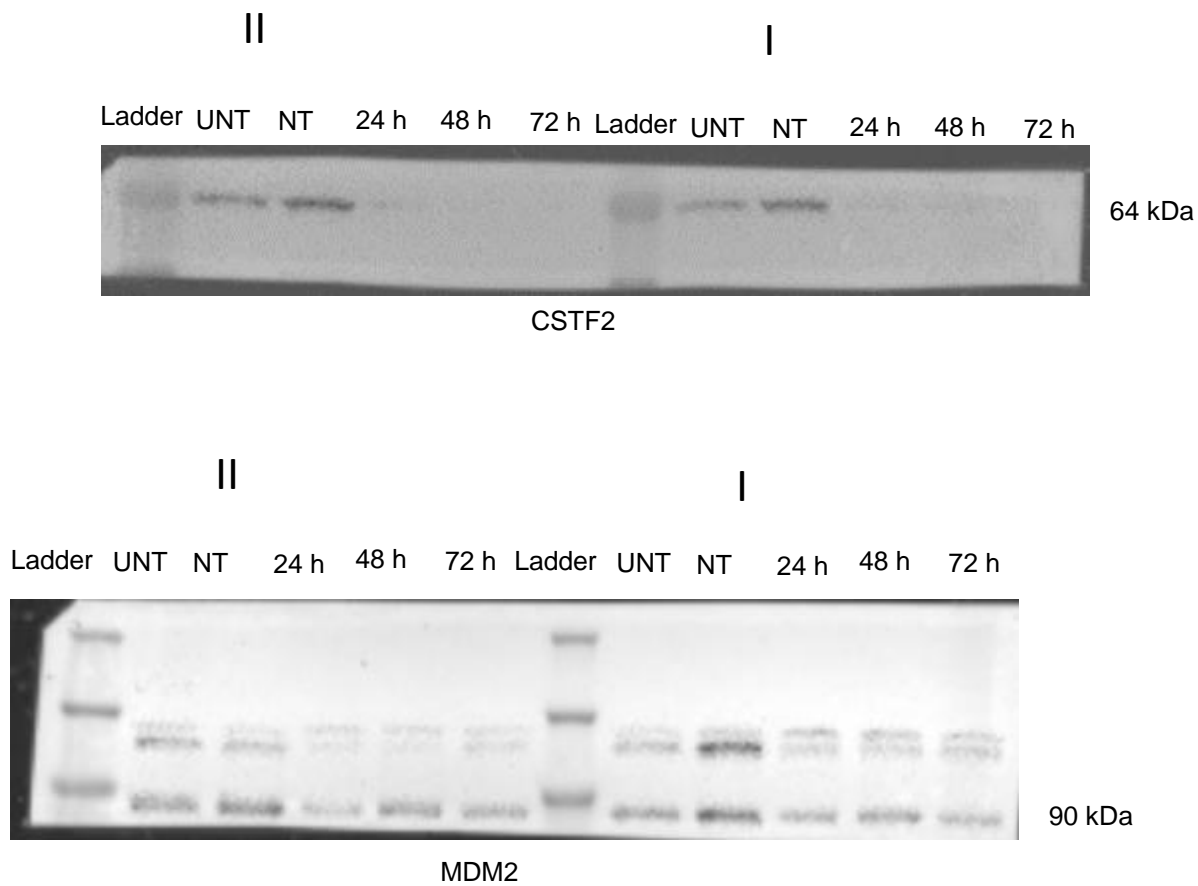

Manuscript  
Image

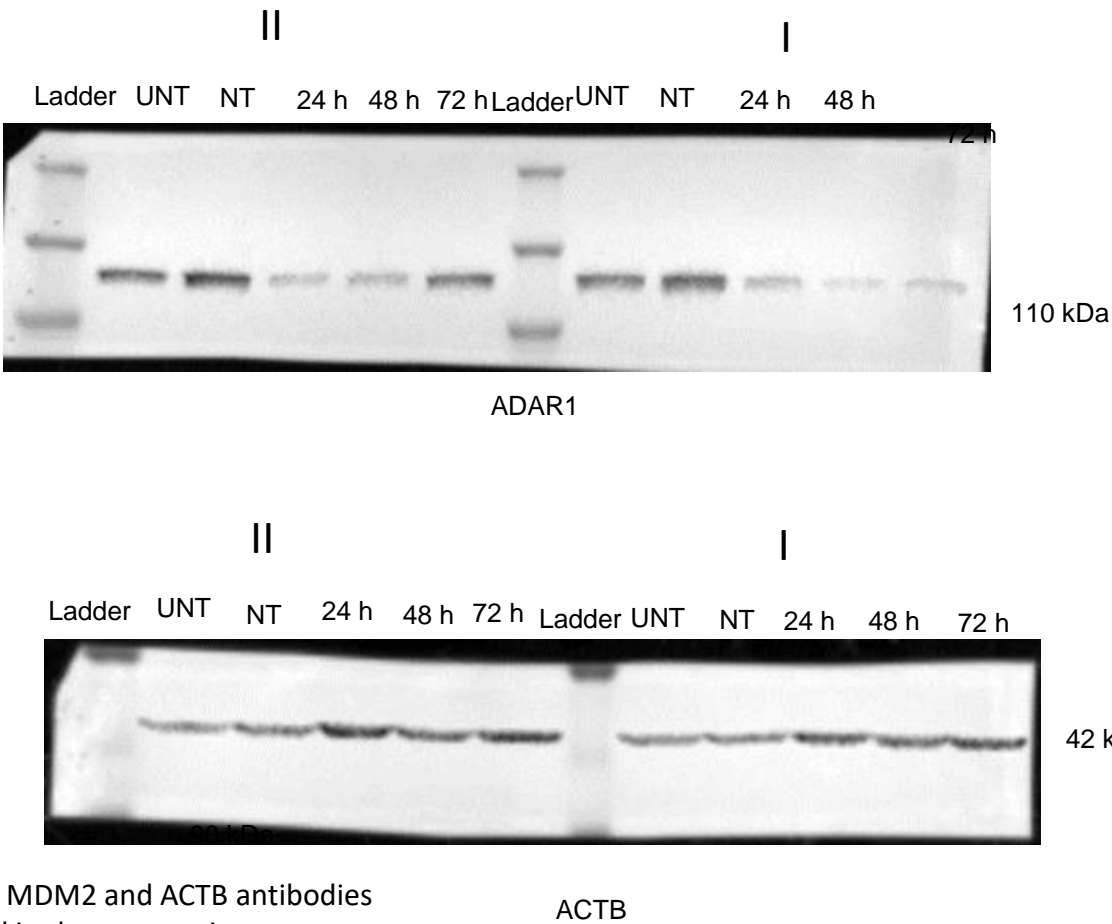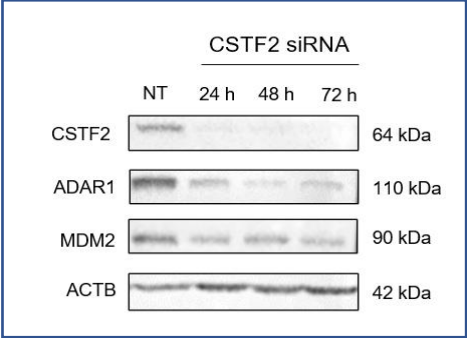

same membrane was cut based on size separation and simultaneously probed with CSTF2, ADAR1, MDM2 and ACTB antibodies  
Group I results are given in manuscript files, ladder and untransfected control lysates were cropped in the manuscript.

Ladder: Thermo Scientific™ PageRuler™ Plus Prestained Protein Ladder, 10 to 250 kDa

Figure S3

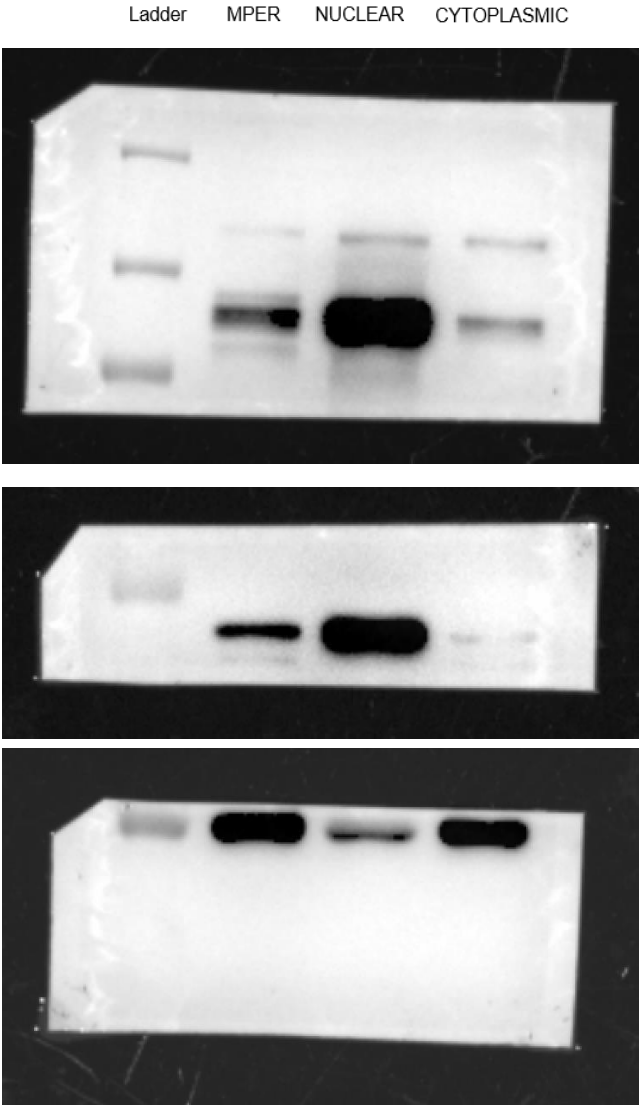

Manuscript Image (Supp)

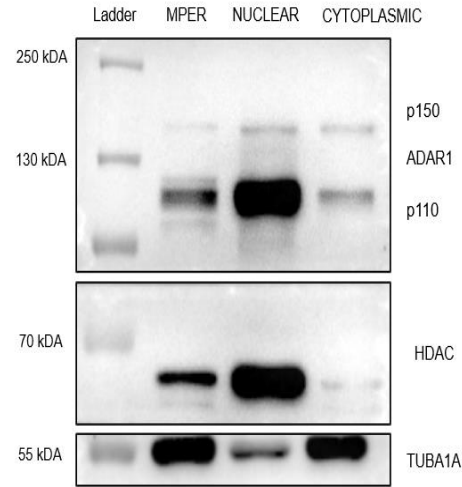

Supplement: MOESM1 [file 10142_2025_1611_MOESM1_ESM.pdf]
